# Supplementary material for: Global sensitivity analysis of the GEOS-Chem chemical transport model: ozone and hydrogen oxides during ARCTAS (2008)
Source: Copernicus journal article supplement (doi:10.5194/acp-17-3769-2017), 2017-03-17
Supplement: Supplementary file 1 [file acp-17-3769-2017-supplement.pdf]

Supplement of Atmos. Chem. Phys., 17, 3769–3784, 2017  
<http://www.atmos-chem-phys.net/17/3769/2017/>  
doi:10.5194/acp-17-3769-2017-supplement  
© Author(s) 2017. CC Attribution 3.0 License.

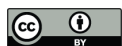

Atmospheric  
Chemistry  
and Physics  
Open Access  
EGU

*Supplement of*

## **Global sensitivity analysis of the GEOS-Chem chemical transport model: ozone and hydrogen oxides during ARCTAS (2008)**

**K. E. Christian et al.**

*Correspondence to:* Kenneth E. Christian (kec5366@psu.edu)

The copyright of individual parts of the supplement might differ from the CC-BY 3.0 licence.

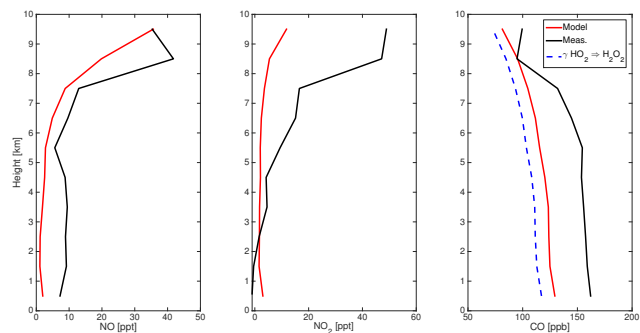

**Figure S 1.** Vertical profile for median modeled (red) and measured (black) NO, NO<sub>2</sub>, and CO for flights during ARCTAS-A flight data binned by kilometer. Blue line represents gamma HO<sub>2</sub> producing H<sub>2</sub>O<sub>2</sub> rather than H<sub>2</sub>O.

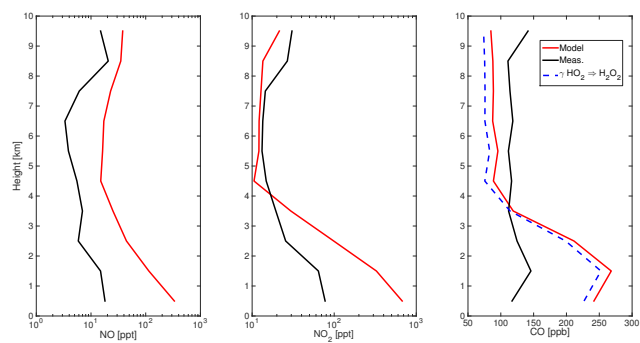

**Figure S 2.** Vertical profile for median modeled (red) and measured (black) NO, NO<sub>2</sub>, and CO for flights during ARCTAS-B flight data binned by kilometer. Blue line represents gamma HO<sub>2</sub> producing H<sub>2</sub>O<sub>2</sub> rather than H<sub>2</sub>O. Note the logarithmic scale for NO<sub>x</sub> profiles
